# Supplementary material for: Encapsulating TGF-β1 Inhibitory Peptides P17 and P144 as a Promising Strategy to Facilitate Their Dissolution and to Improve Their Functionalization
Source: Pharmaceutics. 2020 May 2;12(5):421. doi: 10.3390/pharmaceutics12050421 (PMC7284799; doi:10.3390/pharmaceutics12050421)
Supplement: Supplementary file 1 [file pharmaceutics-12-00421-s001.pdf]

# Supplementary Materials: Encapsulating TGF- $\beta$ 1 Inhibitory Peptides P17 and P144 as a Promising Strategy to Facilitate their Dissolution and to Improve their Functionalization

Nemany A. N. Hanafy, Isabel Fabregat, Stefano Leporatti and Maged El Kemary

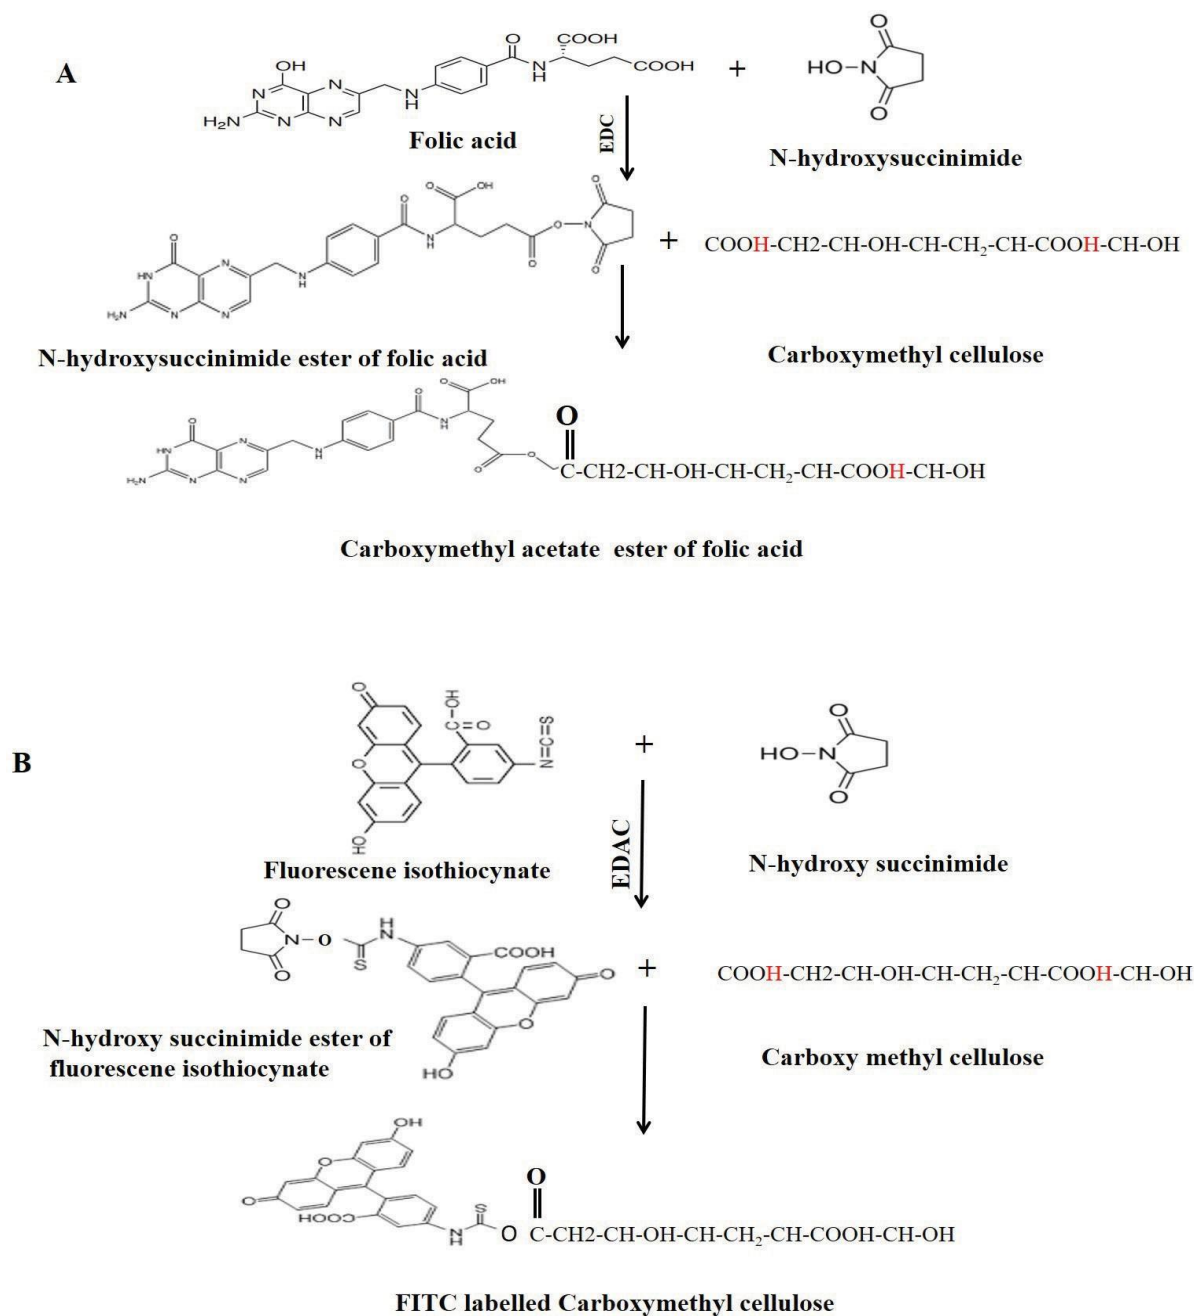

**Scheme S1:** (A): Folic Acid conjugated carboxymethyl cellulose. (B) Labelling carboxymethyl cellulose with FITC.

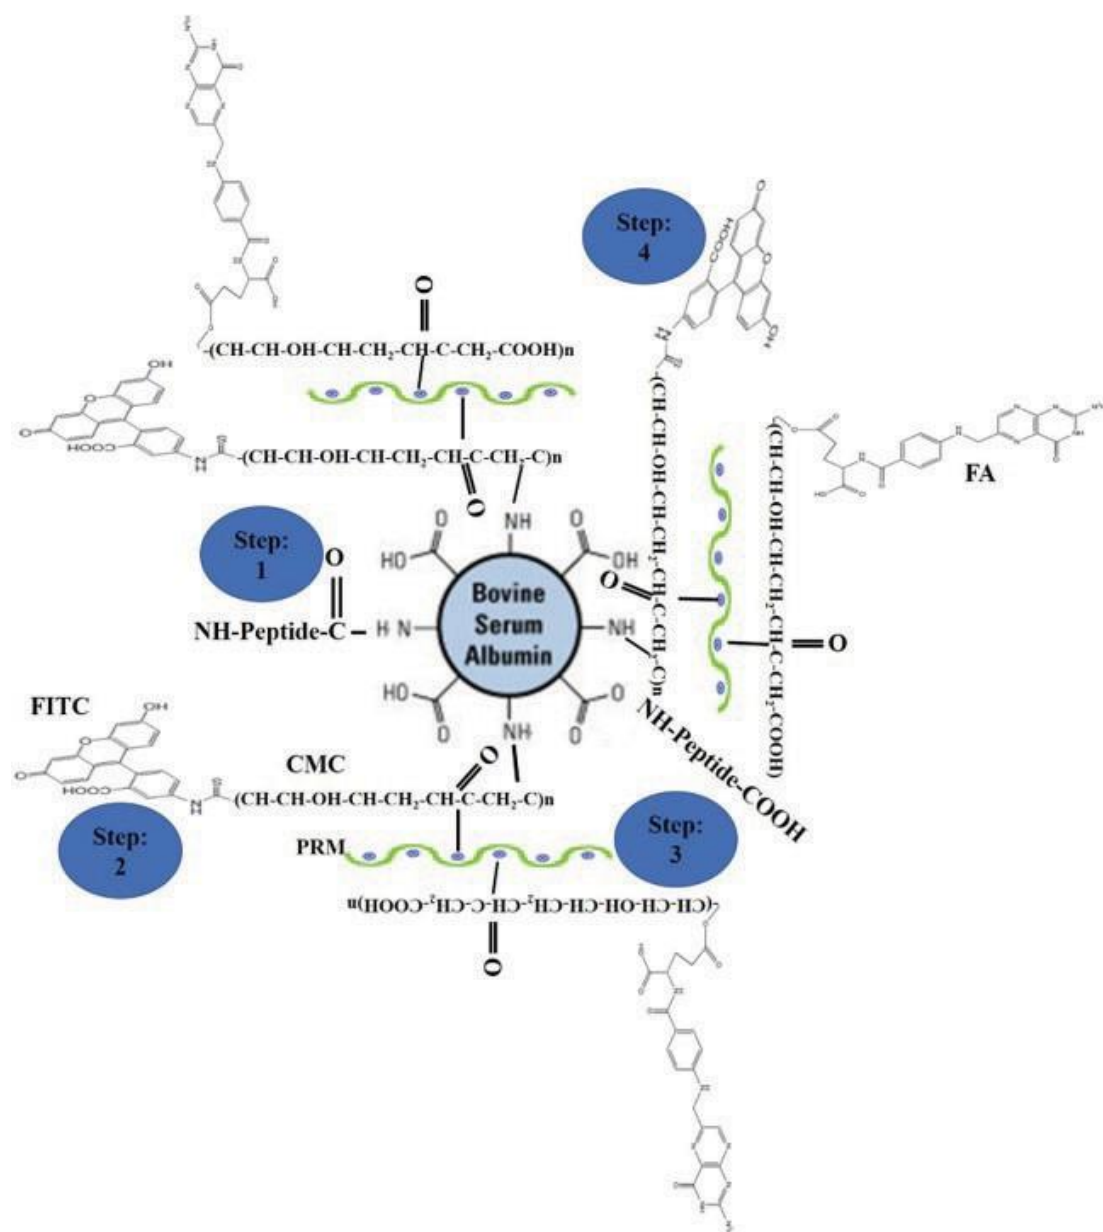

**Scheme S2:** Fabrication of protein mucoadhesive targeted therapy. Step 1: interaction of BSA and peptide. Step 2: protein peptide complex coated by CMC alone or with FITC-CMC in case of free capsules. Step 3: addition of protamine (PRM). Step 4: functionalization of all the structure with folic acid conjugated carboxymethyl cellulose.

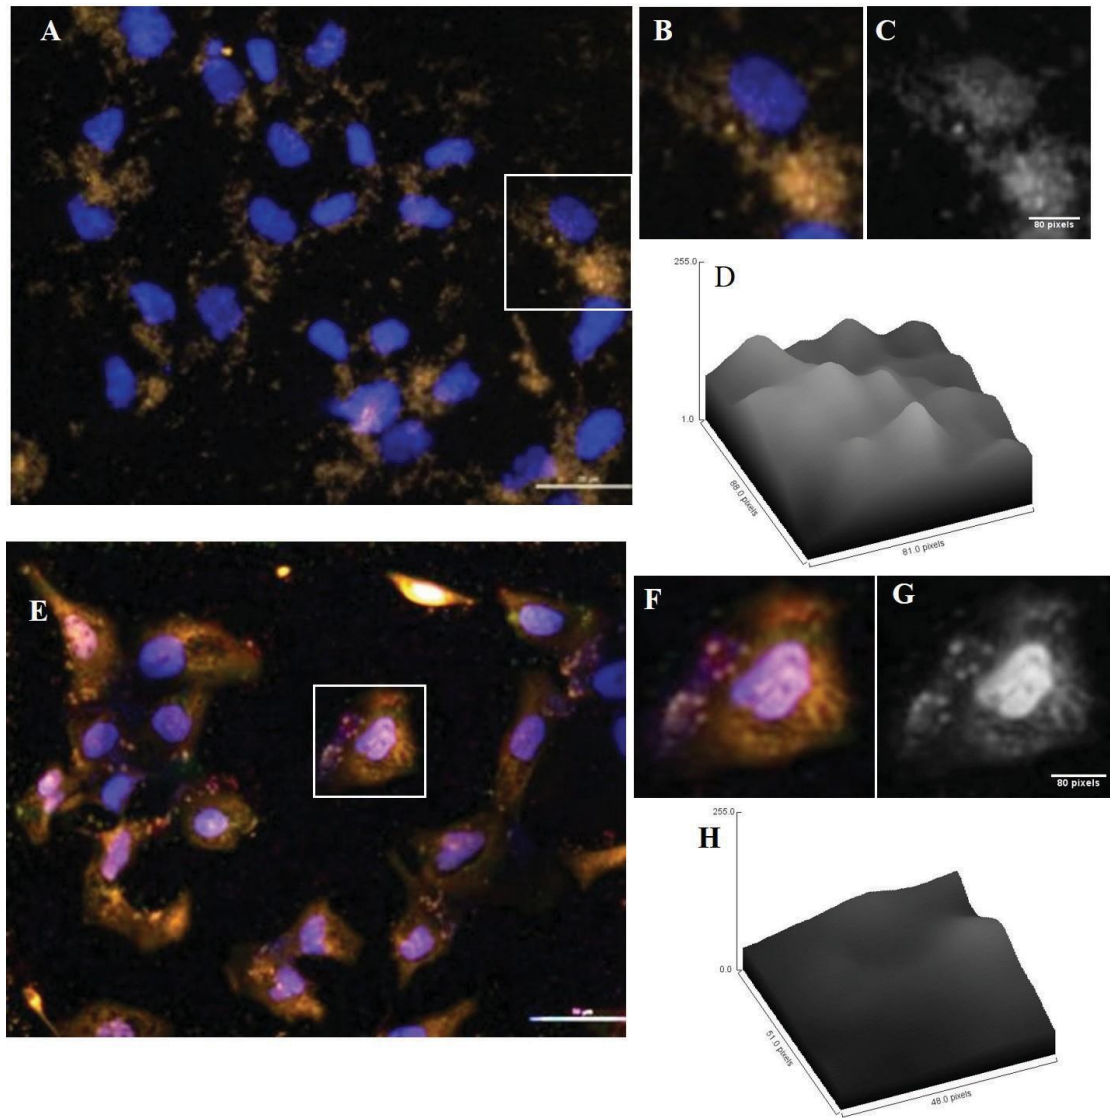

**Figure S1.** Fluorescence microscopy images for labelled P144. (A) Not encapsulated labelled p144. (B) Magnification of few cells; (C) Image J analysis "Grayscale image"; (D) Image J analysis "surface plot"; (E) Encapsulated labelled P144; (F) Magnification of few cells. (G) Image J analysis "Grayscale image"; (H) Image J analysis "surface plot".
